# Supplementary material for: Alloying two-dimensional VSi2N4 to realize an ideal half-metal towards spintronic applications
Source: Royal Society of Chemistry journal article supplement (doi:10.1039/d4cp03305a), 2024-12-30
Supplement: d4cp03305a1.pdf [file d4cp03305a1.pdf]

## Supplementary Information for

### **Alloying two-dimensional $\text{VSi}_2\text{N}_4$ to realize ideal half-metal towards spintronics**

Jin-Lan Sun<sup>†</sup>, Wei-Kang Zhang<sup>†</sup>, Mi-Mi Dong, Zong-Liang Li, Chuan-Kui Wang\* and  
Xiao-Xiao Fu\*

Shandong Key Laboratory of Medical Physics and Image Processing & Shandong  
Provincial Engineering and Technical Center of Light Manipulations, School of  
Physics and Electronics, Shandong Normal University, Jinan 250358, China.

These authors contributed equally to this work.

E-mail: [ckwang@sdu.edu.cn](mailto:ckwang@sdu.edu.cn), [fuxiaoxiao@sdu.edu.cn](mailto:fuxiaoxiao@sdu.edu.cn)

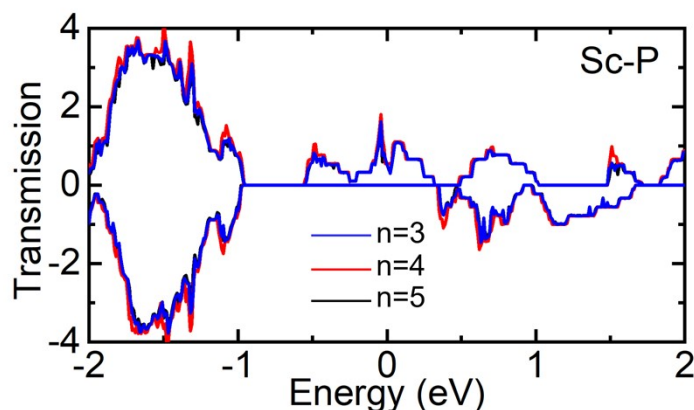

Fig. S1. The zero-bias transmission spectra of the Sc-doped  $\text{VSi}_2\text{N}_4$  device with the central region containing 3, 4, and 5 units with parallel magnetization configuration.

Table S1. Total energy  $E_{\text{total}}$  (eV) for the pure and Sc-doped  $\text{VSi}_2\text{N}_4$  systems with ferromagnetic (FM) and antiferromagnetic (AFM) configurations

| $E_{\text{total}}$ (eV) | FM           | AFM1         | AFM2         | AFM3         |
|-------------------------|--------------|--------------|--------------|--------------|
| pure                    | -13491.87306 | -13491.87305 | -13491.87304 |              |
| Sc-doped                | -51199.41565 | -51199.41565 | -51199.41565 | -51199.41565 |

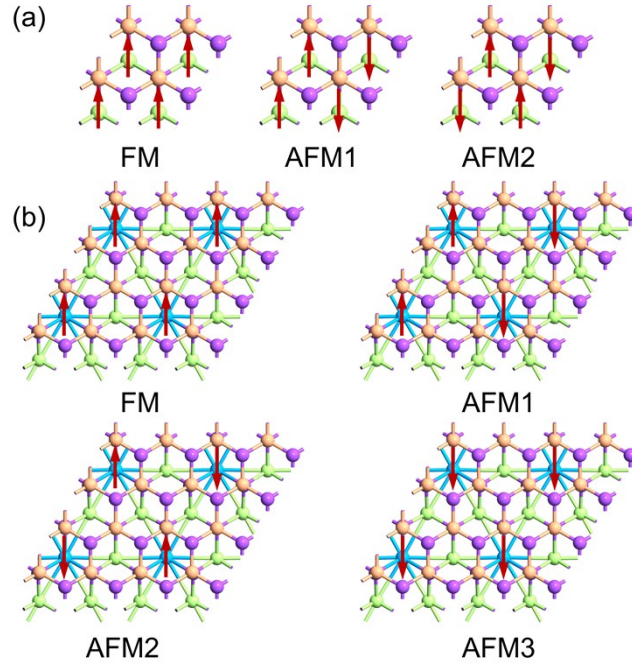

Fig. S2. Ferromagnetic (FM) and antiferromagnetic (AFM) configurations of (a) the pure VSi<sub>2</sub>N<sub>4</sub> system and (b) the Sc-doped VSi<sub>2</sub>N<sub>4</sub> system. All the V atoms in (b) are in spin-up magnetic order.

Table S2. The formation energy  $E_{\text{form}}$  (eV), magnetic moment  $M$  ( $\mu_B$ ), and band gap  $E_{\text{gap}}$  (eV) of the transition metal atom (Sc-Ni, Y-Mo) doped VSi<sub>2</sub>N<sub>4</sub> system, in comparison of those with  $U$  correction ( $U=3.0$  eV).

| System | $E_{\text{form}}$ | $M$  | $E_{\text{gap\_up}}$ | $E_{\text{gap\_down}}$ | $M$<br>(+U) | $E_{\text{gap\_up}}$<br>(+U) | $E_{\text{gap\_down}}$<br>(+U) |
|--------|-------------------|------|----------------------|------------------------|-------------|------------------------------|--------------------------------|
| pure   | ---               | 0.98 | 0.00                 | 1.74                   | 1.00        | 0.05                         | 2.00                           |
| Sc     | -3.08             | 2.00 | 0.00                 | 1.32                   | 2.00        | 0.00                         | 1.92                           |
| Ti     | -5.20             | 3.00 | 0.21                 | 1.68                   | 3.00        | 1.54                         | 1.94                           |
| Cr     | -2.39             | 2.15 | 0.00                 | 0.00                   | 5.00        | 0.00                         | 2.32                           |
| Mn     | -1.80             | 0.00 | 0.23                 | 0.23                   | 6.00        | 1.24                         | 2.23                           |
| Fe     | -2.37             | 0.00 | 0.00                 | 0.00                   | 7.00        | 0.00                         | 1.83                           |
| Co     | -1.76             | 0.00 | 0.00                 | 0.00                   | 4.00        | 0.94                         | 0.00                           |
| Ni     | 0.08              | 1.20 | 0.00                 | 0.00                   | 3.00        | 0.73                         | 1.23                           |
| Y      | -1.92             | 2.00 | 0.00                 | 0.90                   | 2.00        | 0.00                         | 1.61                           |
| Zr     | -6.25             | 3.00 | 0.30                 | 1.50                   | 3.00        | 1.25                         | 1.72                           |
| Nb     | -6.95             | 3.70 | 0.00                 | 0.00                   | 4.00        | 0.29                         | 1.89                           |
| Mo     | -5.40             | 1.93 | 0.00                 | 0.00                   | 3.43        | 0.00                         | 0.00                           |

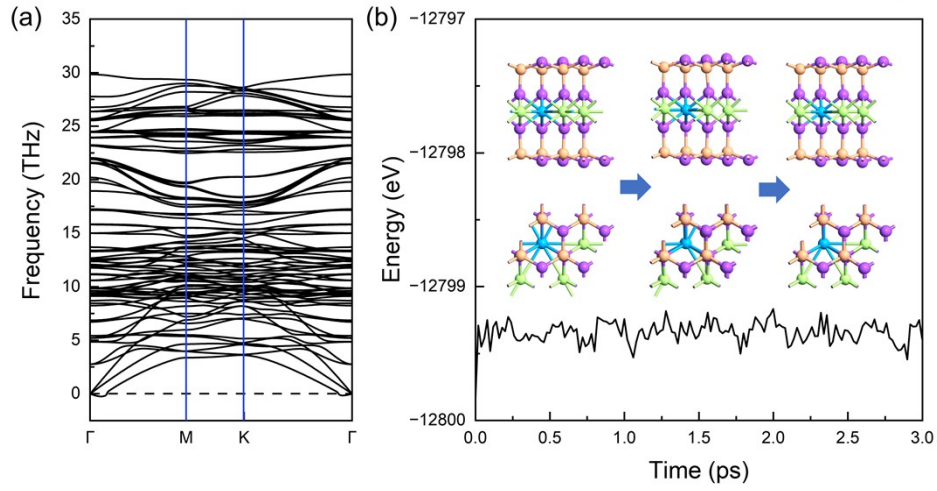

Fig. S3. (a) The phonon spectra and (b) AIMD simulations of the Sc-doped  $\text{VSi}_2\text{N}_4$  system. The molecular dynamics at 300 K for 3 ps with 1 fs time step: total energy and structure over time.

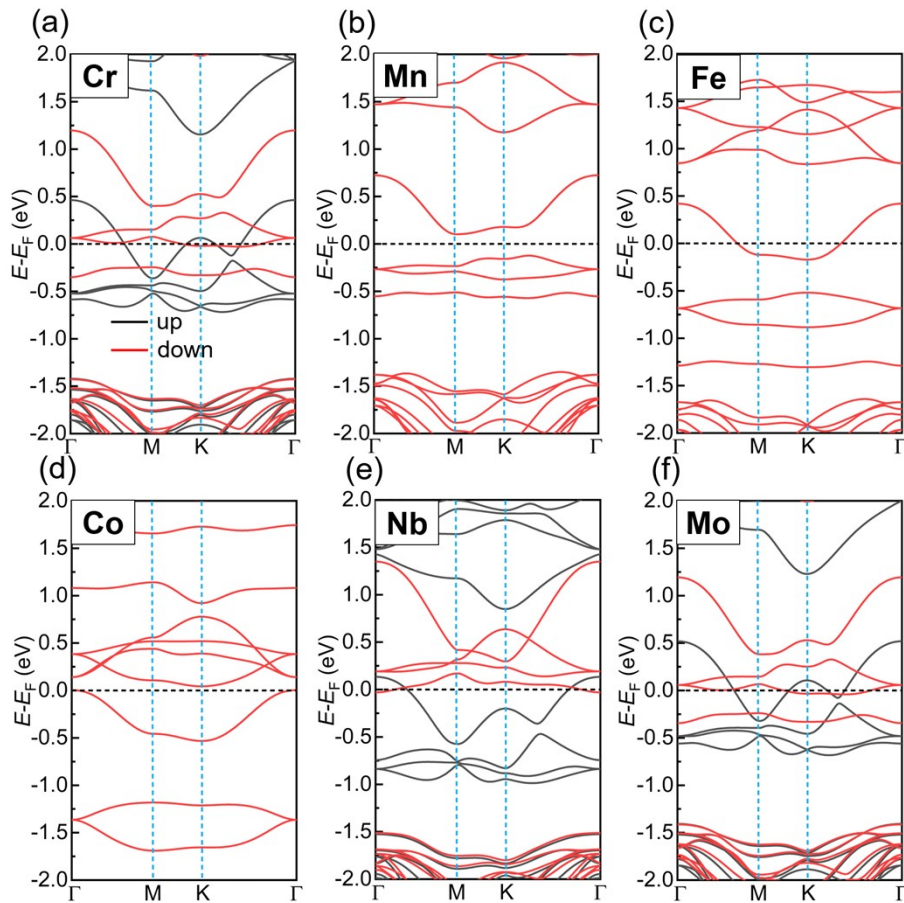

Fig. S4. The band structures of the transition metal atoms (Cr, Mn, Fe, Co, Nb, and Mo) doped  $\text{VSi}_2\text{N}_4$  monolayers.

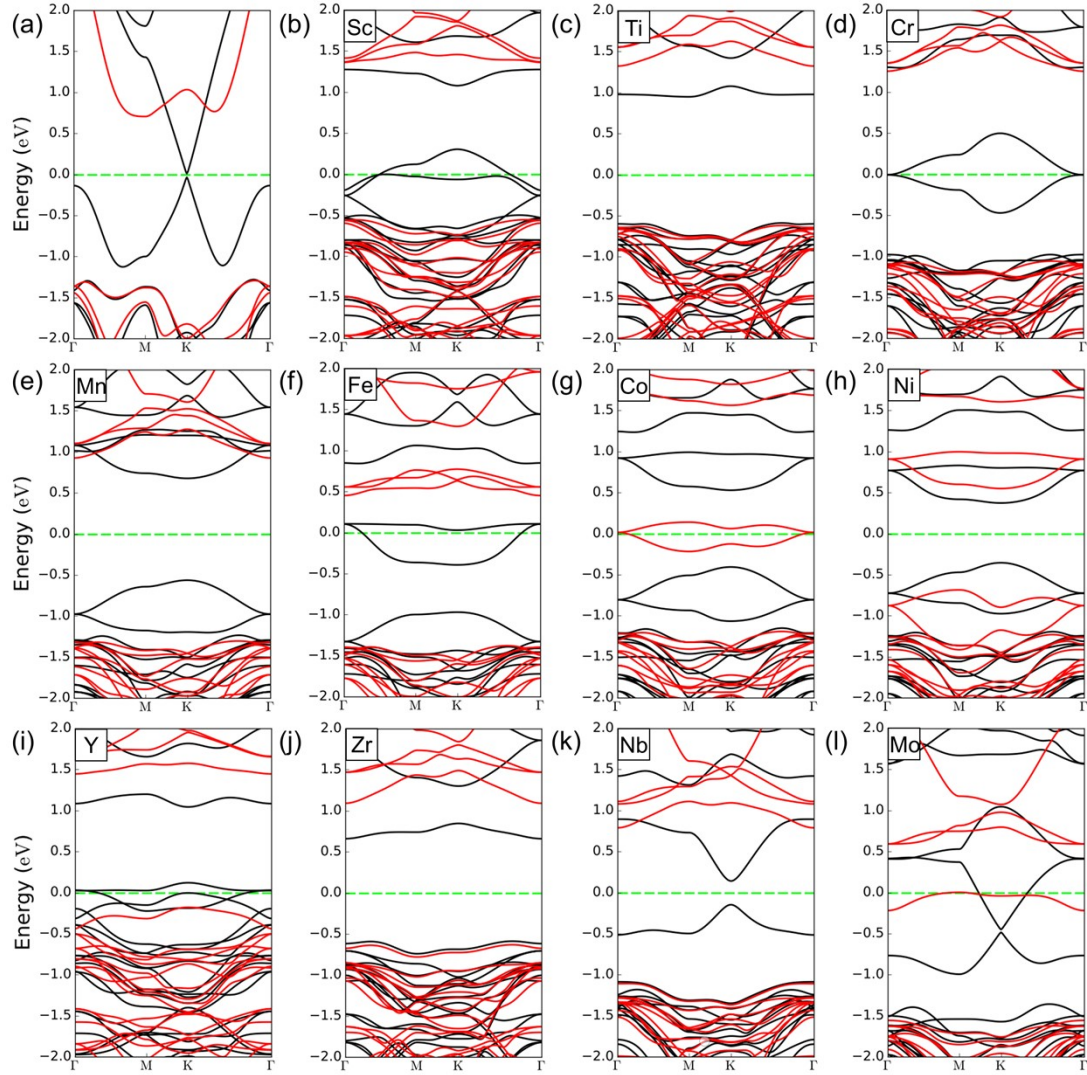

Fig. S5. The band structures of (a) the pure  $\text{VSi}_2\text{N}_4$  and (b-l) the transition metal atom (Sc-Ni, Y-Mo) doped  $\text{VSi}_2\text{N}_4$  systems within the Hubbard  $U$  approach ( $U=3.0$  eV). Spin-up and spin-down bands are denoted by the black and red lines, respectively.

Table S3. Spin bandgap ( $E_{\text{gap\_up}}$  and  $E_{\text{gap\_down}}$ ) of the Sc-doped system with one Sc atom doped in  $2*2$ ,  $3*3$ , and  $4*4$  supercell.

| Sc-doped system             | $2*2$ | $3*3$ | $4*4$ |
|-----------------------------|-------|-------|-------|
| $E_{\text{gap\_up}}$ (eV)   | 0.00  | 0.00  | 0.00  |
| $E_{\text{gap\_down}}$ (eV) | 1.32  | 1.29  | 1.33  |



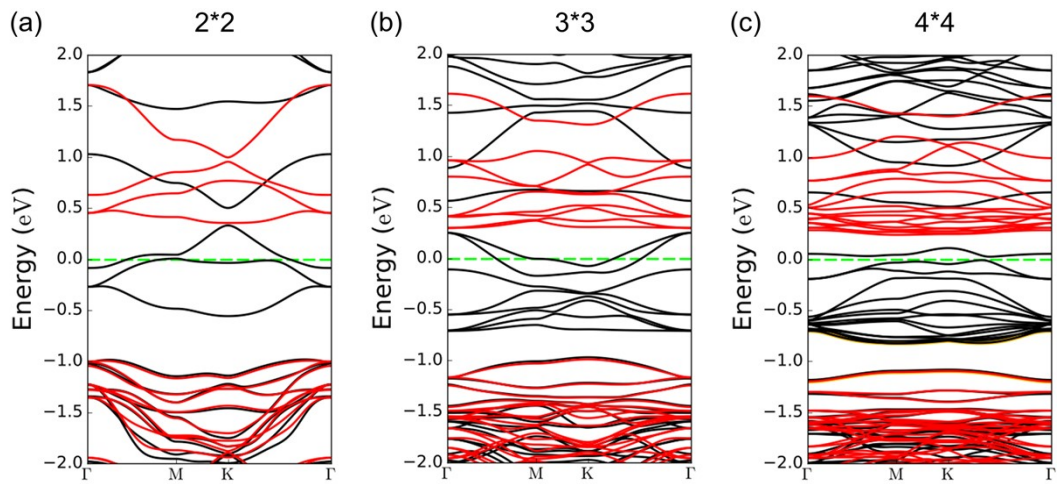

Fig. S6. The energy band of the Sc-doped system with one Sc atom doped in (a) 2\*2, (b) 3\*3, and (c) 4\*4 supercell.

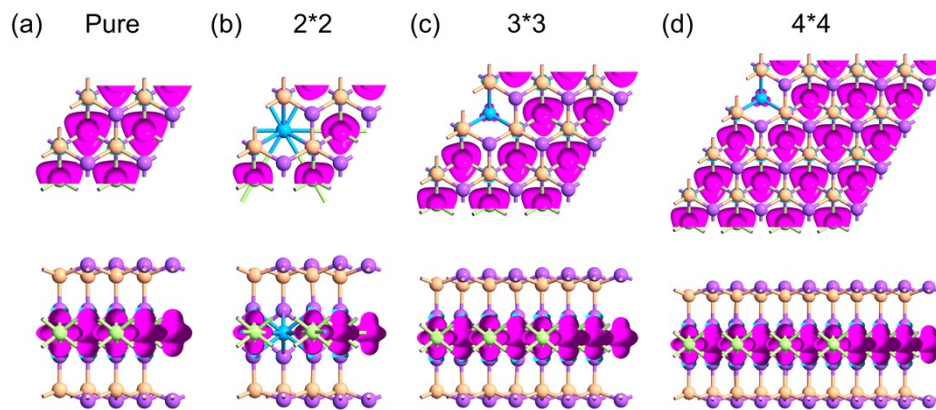

Fig. S7. Spin electron density of (a) the pure  $\text{VSi}_2\text{N}_4$  system and the Sc-doped  $\text{VSi}_2\text{N}_4$  system with (b) 2\*2, (c) 3\*3, and (d) 4\*4 supercell. The pink color shows the up-spin electrons. The iso-value is 0.05.
